# Supplementary material
Source: publisher site journal article supplement (https://www.spandidos-publications.com/1424/downloadSupplementary)
Supplement: Supplementary file 1 [file downloadSupplementary]

Figure S1. Transfection efficiency. (A) C57BL/6 cells were transfected with *circ-0070934* siRNAs or *circ-0070934* overexpression plasmids, and the mRNA levels of *circ-0070934* were detected by RT-qPCR. (B) C57BL/6 cells were transfected with miR-1236-3p mimics or miR-1236-3p inhibitors. RT-qPCR was conducted to detect miR-1236-3p levels compared with the control. All experiments were conducted in triplicate. Data are presented as the mean  $\pm$  SD. \*\* $P < 0.01$ , \*\*\* $P < 0.001$  vs. control. C57BL/6, cutaneous squamous cell carcinoma; si, small interfering RNA; circ, circular RNA; RT-qPCR, reverse transcription-quantitative PCR; miR, microRNA; OE, overexpression vector; NC, negative control; inh, inhibitor.

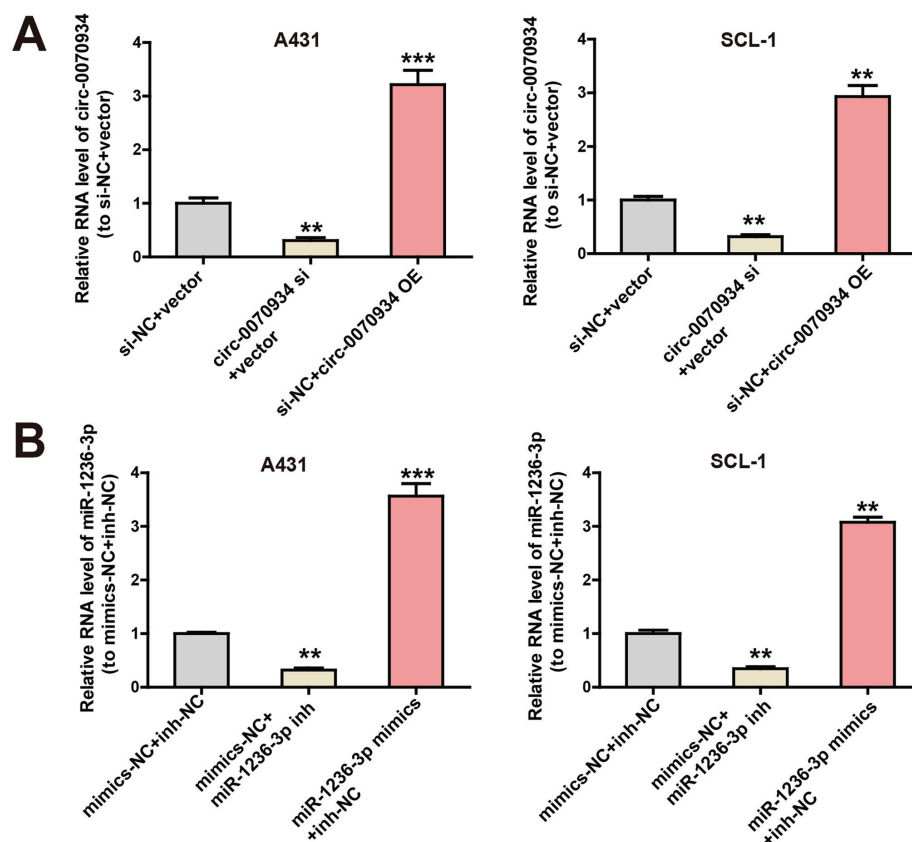

Table SI. Sequences of primers for reverse transcription-quantitative PCR and oligomers for transfections.

| Name                       | Sequences (5'→3')                                                                       |
|----------------------------|-----------------------------------------------------------------------------------------|
| hsa_circ_0070934           | F: GGTGTATCCTGTGGAAGAAGC<br>R: TTGGCCAATTCTCCATATCA                                     |
| HOXB7                      | F: TTCCCAGAACAACTTCTTGTGC<br>R: GCATGTTGAAGGAACTCGGCT                                   |
| GAPDH                      | F: GCACCGTCAAGGCTGAGAAC<br>R: GGATCTCGCTCCTGGAAGATG                                     |
| U6                         | F: CTCGCTTCGGCAGCACA<br>R: AACGCTTCACGAATTTGCGT                                         |
| miR-1236-3p                | F: ACACTCCAGCTGGGGACCTCTCTGTTCCCC<br>R: CTCAACTGGTGTCTGTTGAGTCTGGCAATTCAGTTGAG GGAGAAGG |
| hsa_circ_0070934 siRNA     | S: ATTAAGCGTCAAATAATTCTT<br>AS: GAATTATTTGACGCTTAATTT                                   |
| siRNA negative control     | S: UUCUCCGAACGUGUCACGUTT<br>AS: ACGUGACACGUUCGGAGAATT                                   |
| miR-1236-3p mimics         | S: CCUCUUCUUUUUGUCUCUCCAG<br>AS: GGAGAGACAAGGGGAAGAGGUU                                 |
| Mimics negative control    | S: CCUCUUCUUUUUGUCUCUCCAG<br>AS: GGAGAGACAAGGGGAAGAGGUU                                 |
| miR-1236-3p inhibitor      | S: CUGGAGAGACAAGGGGAAGAGG                                                               |
| Inhibitor negative control | S: CAGUACUUUUUGUGUAGUACAA                                                               |

F, forward; R, reverse; S, sense; AS, anti-sense; circ, circular RNA; siRNA, small interfering RNA; miR, microRNA; HOXB7, homeobox B7.
